# Supplementary material for: SAAFEC: Predicting the Effect of Single Point Mutations on Protein Folding Free Energy Using a Knowledge-Modified MM/PBSA Approach
Source: Int J Mol Sci. 2016 Apr 7;17(4):512. doi: 10.3390/ijms17040512 (PMC4848968; doi:10.3390/ijms17040512)
Supplement: Supplementary file 1 [file ijms-17-00512-s001.pdf]

# Supplementary Material: SAAFEC: Predicting the Effect of Single Point Mutations on Protein Folding Free Energy Using a Knowledge-Modified MM/PBSA Approach

Ivan Getov, Marharyta Petukh and Emil Alexov

Typically the accuracy of predictions of disease-causing mutations is evaluated via the ROC parameters adopting particular cut-offs for true and false positives. Several quantities are evaluated with Equations (S1)–(S6) using the relationship between four quantities: true positive (tp), true negative (tn), false positive (fp) and false negative (fn) (definitions are provided in Table S1. The cut-offs of 0.5 and 1.5 kcal/mol are taken from our previous work [29]). The corresponding ROC results are shown in Table S2.

$$accuracy = \frac{tp + tn}{tp + tn + fp + fn} \quad (S1)$$

$$sensitivity = \frac{tp}{tp + fn} \quad (S2)$$

$$specificity = \frac{tn}{tn + fp} \quad (S3)$$

$$precision = \frac{tp}{tp + fp} \quad (S4)$$

$$NPV = \frac{tn}{tn + fn} \quad (S5)$$

$$MCC = \frac{tp \cdot tn + fp \cdot fn}{\sqrt{(tp + fp) \cdot (tp + fn) \cdot (tn + fp) \cdot (tn + fn)}} \quad (S6)$$

**Table S1.** Four possible relationships between experimental and calculated values of the change of folding free energy.

|          | True                                                                                                                                                                                          | False                                                                                                               |
|----------|-----------------------------------------------------------------------------------------------------------------------------------------------------------------------------------------------|---------------------------------------------------------------------------------------------------------------------|
| positive | $\left\{ \begin{array}{l}  \Delta\Delta G_{exp}  \geq 1.5 \\  \Delta\Delta G_{calc}  \geq 0.5 \\ \text{sign}(\Delta\Delta G_{exp}) = \text{sign}(\Delta\Delta G_{calc}) \end{array} \right\}$ | $\left\{ \begin{array}{l}  \Delta\Delta G_{exp}  \leq 0.5 \\  \Delta\Delta G_{calc}  \geq 1.5 \end{array} \right\}$ |
| negative | $\left\{ \begin{array}{l}  \Delta\Delta G_{exp}  \leq 0.5 \\  \Delta\Delta G_{calc}  \leq 1.5 \end{array} \right\}$                                                                           | $\left\{ \begin{array}{l}  \Delta\Delta G_{exp}  \geq 1.5 \\  \Delta\Delta G_{calc}  \leq 0.5 \end{array} \right\}$ |

**Table S2.** Calculated ROC quantities. NPV is negative predictive value and MCC is Matthew correlation coefficient.

|             |       |
|-------------|-------|
| Accuracy    | 0.914 |
| Sensitivity | 0.965 |
| Specificity | 0.837 |
| Precision   | 0.899 |
| NPV         | 0.942 |
| MCC         | 0.833 |

Further we provide definitions for classifying the mutation sites as buried, partially buried and exposed (Table S3).

**Table S3.** Description of residue burial in proteins in tDB.

| Buried (B)             | rSASA = 0                  |
|------------------------|----------------------------|
| Partially Exposed (PE) | rSASA ≤ 0.25 and rSASA > 0 |
| Exposed (E)            | rSASA > 0.25               |

The maximum number of rotamers used for the entropy estimation. (Table S4).

**Table S4.** The maximum number of rotamers per residue.

|   | A | C | D  | E  | F  | G | H  | I | K  | L | M  | N  | P | Q   | R  | S | T | V | W  | Y  |
|---|---|---|----|----|----|---|----|---|----|---|----|----|---|-----|----|---|---|---|----|----|
| R | 1 | 3 | 18 | 54 | 18 | 1 | 36 | 9 | 81 | 9 | 27 | 36 | 2 | 108 | 81 | 3 | 3 | 3 | 36 | 18 |

Comparisons of SAAFEC performance with other leading folding free energy changes predictors (Table S5). The results are obtained by taking randomly 100 cases from tDB.

**Table S5.** Predictors and their performance.

| Predictor | Correlation Coefficient (R) |
|-----------|-----------------------------|
| SAAFEC    | 0.59                        |
| PoPMuSiC  | 0.34                        |
| FoldX     | 0.42                        |
| I-Mutant  | 0.67                        |
| DUET      | 0.58                        |
